# Supplementary material for: Efficient catalytic oxidation of biomass to formic acid coupled with low-energy formaldehyde production from methanol
Source: Royal Society of Chemistry journal article supplement (doi:10.1039/d3gc03892k), 2024-01-01
Supplement: d3gc03892k1.pdf [file d3gc03892k1.pdf]

## Supplementary Information

### **Efficient catalytic oxidation of biomass to formic acid coupled with low-energy formaldehyde production from methanol**

Zhuosen He<sup>a</sup>, Yucui Hou<sup>b</sup>, Jian Wei<sup>a</sup>, Shuhang Ren<sup>a</sup>, Weize Wu<sup>a,\*</sup>

*<sup>a</sup> State Key Laboratory of Chemical Resource Engineering, Beijing University of Chemical  
Technology, Beijing, 100029, China*

*<sup>b</sup> College of Chemistry and Materials, Taiyuan Normal University, Shanxi, 030619, China*

---

\* Corresponding author. wzwu@mail.buct.edu.cn (W. Wu)

## Table of Contents

|                               |     |
|-------------------------------|-----|
| Supplementary Tables.....     | S2  |
| Supplementary Figures .....   | S7  |
| Supplementary References..... | S18 |

### Supplementary Tables

**Table S1** Literature review on catalytic aerobic oxidation of biomass with vanadium-based catalyst<sup>a</sup>

| Substrate                                         | Catalyst                                                                            | Solvent                                             | Additive                         | FA (ester)<br>yield (%) | Ref.      |
|---------------------------------------------------|-------------------------------------------------------------------------------------|-----------------------------------------------------|----------------------------------|-------------------------|-----------|
| Cellulose                                         | HPA-5 + H <sub>2</sub> SO <sub>4</sub>                                              | H <sub>2</sub> O                                    | CH <sub>3</sub> OH (value-added) | 76                      | This work |
|                                                   | VOSO <sub>4</sub>                                                                   | H <sub>2</sub> O                                    |                                  | 39                      | 1         |
|                                                   | NaVO <sub>3</sub> -H <sub>2</sub> SO <sub>4</sub>                                   | H <sub>2</sub> O                                    |                                  | 65                      | 2         |
|                                                   | NaVO <sub>3</sub> -FeCl <sub>3</sub> -H <sub>2</sub> SO <sub>4</sub>                | H <sub>2</sub> O                                    |                                  | 67                      | 3         |
|                                                   | HPA-1                                                                               | H <sub>2</sub> O                                    |                                  | 68                      | 4         |
|                                                   | HPA-2 + TSA <sup>b</sup>                                                            | H <sub>2</sub> O                                    |                                  | 19                      | 5         |
|                                                   | HPA-5 + TSA                                                                         | H <sub>2</sub> O                                    |                                  | 28                      | 6         |
|                                                   | HPA-2 + H <sub>2</sub> SO <sub>4</sub>                                              | H <sub>2</sub> O                                    |                                  | 61                      | 7         |
|                                                   | Co <sub>0.6</sub> H <sub>3.8</sub> PMo <sub>10</sub> V <sub>2</sub> O <sub>40</sub> | H <sub>2</sub> O                                    |                                  | 66                      | 8         |
|                                                   | [MIMPS] <sub>3</sub> [HPVMO <sub>11</sub> O <sub>40</sub> ]                         | H <sub>2</sub> O                                    |                                  | 51                      | 9         |
|                                                   | VOSO <sub>4</sub>                                                                   | H <sub>2</sub> O + C <sub>2</sub> H <sub>5</sub> OH |                                  | 70                      | 1         |
| NaVO <sub>3</sub> -H <sub>2</sub> SO <sub>4</sub> | H <sub>2</sub> O                                                                    | DMSO <sup>c</sup> (consumed)                        | 68                               | 10                      |           |
| Glucose                                           | HPA-5                                                                               | H <sub>2</sub> O                                    | CH <sub>3</sub> OH (value-added) | 85                      | This work |
|                                                   | VOSO <sub>4</sub>                                                                   | H <sub>2</sub> O                                    |                                  | 53                      | 1         |
|                                                   | NaVO <sub>3</sub> -H <sub>2</sub> SO <sub>4</sub>                                   | H <sub>2</sub> O                                    |                                  | 68                      | 2         |
|                                                   | HPA-1                                                                               | H <sub>2</sub> O                                    |                                  | 55                      | 4         |
|                                                   | HPA-2                                                                               | H <sub>2</sub> O                                    |                                  | 49                      | 11        |
|                                                   | HPA-3                                                                               | H <sub>2</sub> O                                    |                                  | 56                      | 6         |
|                                                   | HPA-4                                                                               | H <sub>2</sub> O                                    |                                  | 52                      | 6         |
|                                                   | HPA-5                                                                               | H <sub>2</sub> O                                    |                                  | 57                      | 6         |
|                                                   | HPA-6                                                                               | H <sub>2</sub> O                                    |                                  | 56                      | 6         |
|                                                   | VOSO <sub>4</sub>                                                                   | H <sub>2</sub> O + CH <sub>3</sub> OH               |                                  | 75                      | 1         |
|                                                   | HPA-2                                                                               | H <sub>2</sub> O + CH <sub>3</sub> OH               |                                  | 78                      | 12        |
|                                                   | HPA-5                                                                               | CH <sub>3</sub> OH                                  |                                  | 99                      | 13        |

| Substrate | Catalyst                                                     | Solvent                                     | Additive                         | FA (ester) yield (%) | Ref.      |
|-----------|--------------------------------------------------------------|---------------------------------------------|----------------------------------|----------------------|-----------|
| Glucose   | HPA-5                                                        | H <sub>2</sub> O + 1-Hexanol<br>(two-phase) |                                  | 85                   | 14        |
|           | NaVO <sub>3</sub> -H <sub>2</sub> SO <sub>4</sub>            | H <sub>2</sub> O                            | DMSO (consumed)                  | 77                   | 10        |
|           | HPA-2                                                        | H <sub>2</sub> O                            | IPA <sup>d</sup> (consumed)      | 92                   | 15        |
| Xylan     | HPA-5                                                        | H <sub>2</sub> O                            | CH <sub>3</sub> OH (value-added) | 80                   | This work |
|           | NaVO <sub>3</sub> -H <sub>2</sub> SO <sub>4</sub>            | H <sub>2</sub> O                            |                                  | 64                   | 2         |
|           | HPA-2                                                        | H <sub>2</sub> O                            |                                  | 33                   | 11        |
|           | HPA-2 + TSA                                                  | H <sub>2</sub> O                            |                                  | 53                   | 5         |
|           | HPA-5 + TSA                                                  | H <sub>2</sub> O                            |                                  | 58                   | 6         |
|           | K <sub>5</sub> V <sub>3</sub> W <sub>3</sub> O <sub>19</sub> | H <sub>2</sub> O                            |                                  | 25                   | 16        |
|           | NaVO <sub>3</sub> -H <sub>2</sub> SO <sub>4</sub>            | H <sub>2</sub> O                            | DMSO (consumed)                  | 67                   | 10        |
|           | HPA-2                                                        | H <sub>2</sub> O                            | IPA (consumed)                   | 64                   | 15        |
| Xylose    | HPA-5                                                        | H <sub>2</sub> O                            | CH <sub>3</sub> OH (value-added) | 89                   | This work |
|           | NaVO <sub>3</sub> -H <sub>2</sub> SO <sub>4</sub>            | H <sub>2</sub> O                            |                                  | 64                   | 2         |
|           | HPA-2                                                        | H <sub>2</sub> O                            |                                  | 54                   | 11        |
|           | NaVO <sub>3</sub> -H <sub>2</sub> SO <sub>4</sub>            | H <sub>2</sub> O                            | DMSO (consumed)                  | 74                   | 10        |
|           | HPA-2                                                        | H <sub>2</sub> O                            | IPA (consumed)                   | 72                   | 15        |

<sup>a</sup> Blue fill color represents the normal catalytic aerobic oxidation. Orange fill color represents the catalytic aerobic oxidation in alcohol-water solvents. Green fill color represents the catalytic aerobic oxidation with additives. <sup>b</sup> TSA: *p*-toluenesulfonic acid. <sup>c</sup> DMSO: dimethyl sulfoxide. <sup>d</sup> IPA: isopropanol.

**Table S2** Proximate and ultimate analyses of enzymatic lignin<sup>a</sup>

| Proximate analysis (wt%) |                       |                         | Ultimate analysis (wt%, in daf. basis) |      |                |      |      |
|--------------------------|-----------------------|-------------------------|----------------------------------------|------|----------------|------|------|
| <i>M</i> <sub>ad</sub>   | <i>A</i> <sub>d</sub> | <i>V</i> <sub>daf</sub> | C                                      | H    | O <sup>b</sup> | N    | S    |
| 2.48                     | 1.60                  | 63.78                   | 63.97                                  | 5.54 | 29.55          | 0.79 | 0.15 |

<sup>a</sup> ad: air-dry basis; d: dry basis; daf: dry-and-ash-free basis. *M*: moisture; *A*: ash; *V*: volatile matter content. <sup>b</sup> By difference.

**Table S3** Elemental analysis of the corn stalk

| Element | C     | H    | O <sup>a</sup> | N    | S    |
|---------|-------|------|----------------|------|------|
| 100 w   | 43.28 | 5.86 | 49.76          | 1.07 | 0.03 |

<sup>a</sup> By difference.

**Table S4** Lignocellulose component analysis of the corn stalk<sup>a</sup>

| Component | Cellulose | Hemicellulose | Lignin | Ash  | Extraction |
|-----------|-----------|---------------|--------|------|------------|
| 100 w     | 36.52     | 29.14         | 4.40   | 1.57 | 28.36      |

<sup>a</sup> The components of corn stalk were analyzed according to the Van Soest method.

**Table S5** ICP-OES and TG analyses of HPA-*n*

| Compound | Molecular composition                                              | P/V/Mo ratio | Hydration Water <sup>a</sup> (mole) |
|----------|--------------------------------------------------------------------|--------------|-------------------------------------|
| HPA-0    | H <sub>3</sub> [PMo <sub>12</sub> O <sub>40</sub> ]                | 1/-/12.27    | 9                                   |
| HPA-1    | H <sub>4</sub> [PVMo <sub>11</sub> O <sub>40</sub> ]               | 1/0.87/10.89 | 10                                  |
| HPA-2    | H <sub>5</sub> [PV <sub>2</sub> Mo <sub>10</sub> O <sub>40</sub> ] | 1/1.82/10.27 | 10                                  |
| HPA-3    | H <sub>6</sub> [PV <sub>3</sub> Mo <sub>9</sub> O <sub>40</sub> ]  | 1/2.86/9.15  | 11                                  |
| HPA-4    | H <sub>7</sub> [PV <sub>4</sub> Mo <sub>8</sub> O <sub>40</sub> ]  | 1/4.06/8.33  | 12                                  |
| HPA-5    | H <sub>8</sub> [PV <sub>5</sub> Mo <sub>7</sub> O <sub>40</sub> ]  | 1/5.24/6.83  | 13                                  |
| HPA-6    | H <sub>9</sub> [PV <sub>6</sub> Mo <sub>6</sub> O <sub>40</sub> ]  | 1/5.82/6.28  | 14                                  |

<sup>a</sup> Moles of hydration water determined via TG.

**Table S6** The stabilities of FA and FAld in the catalytic system<sup>a</sup>

| Substrate | Conv. (%) | Yield (%) |                 |     |
|-----------|-----------|-----------|-----------------|-----|
|           |           | FA        | CO <sub>2</sub> | CO  |
| FA        | 18.7      |           | 16.8            | 1.7 |
| FAld      | 59.2      | 48.6      | 6.7             | 2.3 |

<sup>a</sup> Reaction conditions: substrate, 0.32 g; HPA-5, 5.4 mM; H<sub>2</sub>SO<sub>4</sub>, 0.15 M; H<sub>2</sub>O, 20 mL; O<sub>2</sub> pressure, 3 MPa; temperature, 180 °C; reaction time, 20 min.

**Table S7** Conversions of substrates in the coupling oxidations showed in molar amount

| Substrate              | Molar amount (mmol) | Conversion (%) | Converted molar amount (mmol) |
|------------------------|---------------------|----------------|-------------------------------|
| Cellulose <sup>a</sup> | 11.85               | 97.56          | 11.56                         |
| Methanol               | 52.13               | 20.10          | 10.48                         |

<sup>a</sup> The molar amount of cellulose was the molar amount of C atoms in it.

**Table S8** Yields of products in the coupling oxidations showed in molar amount

| Product                   | Molar amount (mmol) | Calculations of FA-1 and FA-2 (mmol)              |
|---------------------------|---------------------|---------------------------------------------------|
| Formic acid               | 11.32               |                                                   |
| Methyl formate            | 0.12                |                                                   |
| Cellobiose                | 0.0004              | FA-2 = converted methanol – FAld – dimethyl ether |
| Glycolic aldehyde         | 0.0027              | = 10.48 – 7.65 – (0.21 × 2) = 2.41                |
| Levulinic acid            | 0.008               |                                                   |
| Acetic acid               | 0.077               |                                                   |
| CO                        | 0.28                | FA-1 = FA – FA-2 = (11.32 + 0.12) – 2.41 = 9.03   |
| CO <sub>2</sub>           | 1.57                |                                                   |
| Formaldehyde <sup>a</sup> | 7.65                |                                                   |
| Dimethyl ether            | 0.21                |                                                   |

<sup>a</sup> Formaldehyde exist in the form of formaldehyde hydrate and methoxymethanol in the methanol-water solution.

**Table S9** TOFs of FA and FAld production in the separate oxidations and the coupling oxidations<sup>a</sup>

| Substrate            | FA (mmol) | FAld (mmol) | HPA-5 (mmol) | TOF <sub>FA</sub> (h <sup>-1</sup> ) | TOF <sub>FAld</sub> (h <sup>-1</sup> ) |
|----------------------|-----------|-------------|--------------|--------------------------------------|----------------------------------------|
| Cellulose            | 4.50      | 0.14        | 0.11         | 122.7                                | 3.8                                    |
| Methanol             | 1.37      | 4.54        | 0.11         | 37.4                                 | 123.8                                  |
| Cellulose + Methanol | 11.44     | 7.65        | 0.11         | 312.0                                | 208.6                                  |

<sup>a</sup> Reaction conditions: cellulose, 0.32 g; methanol, 1.6 g; HPA-5, 5.4 mM; H<sub>2</sub>SO<sub>4</sub>, 0.15 M; H<sub>2</sub>O, 20 mL; O<sub>2</sub> pressure, 3 MPa; temperature, 180 °C; reaction time, 20 min.

**Table S10** ICP-OES analysis of HPA-5 before and after the recycling experiments

| HPA-5          | P/V/Mo ratio |
|----------------|--------------|
| Before recycle | 1/5.24/6.83  |
| After recycle  | 1/5.27/6.79  |

**Table S11** Gram-scale reaction of the coupling oxidations<sup>a</sup>

| Cellulose<br>conv.<br>(%) | Yield<br>(%) |                 |                     | Methanol<br>conv.<br>(%) | Yield<br>(%) |      |                   |
|---------------------------|--------------|-----------------|---------------------|--------------------------|--------------|------|-------------------|
|                           | FA-1         | CO <sub>2</sub> | Others <sup>b</sup> |                          | FA1d         | FA-2 | Dimethyl<br>ether |
| 100                       | 64.1         | 20.2            | 11.6                | 15.7                     | 13.4         | 0.7  | 1.6               |

<sup>a</sup> Reaction conditions: cellulose, 1 g; methanol, 5 g; HPA-5, 17.0 mM; H<sub>2</sub>SO<sub>4</sub>, 0.05 M; H<sub>2</sub>O, 20 mL; O<sub>2</sub> pressure, 5 MPa; temperature, 190 °C; reaction time, 30 min. <sup>b</sup> Other products include acetic acid and carbon monoxide.

## Supplementary Figures

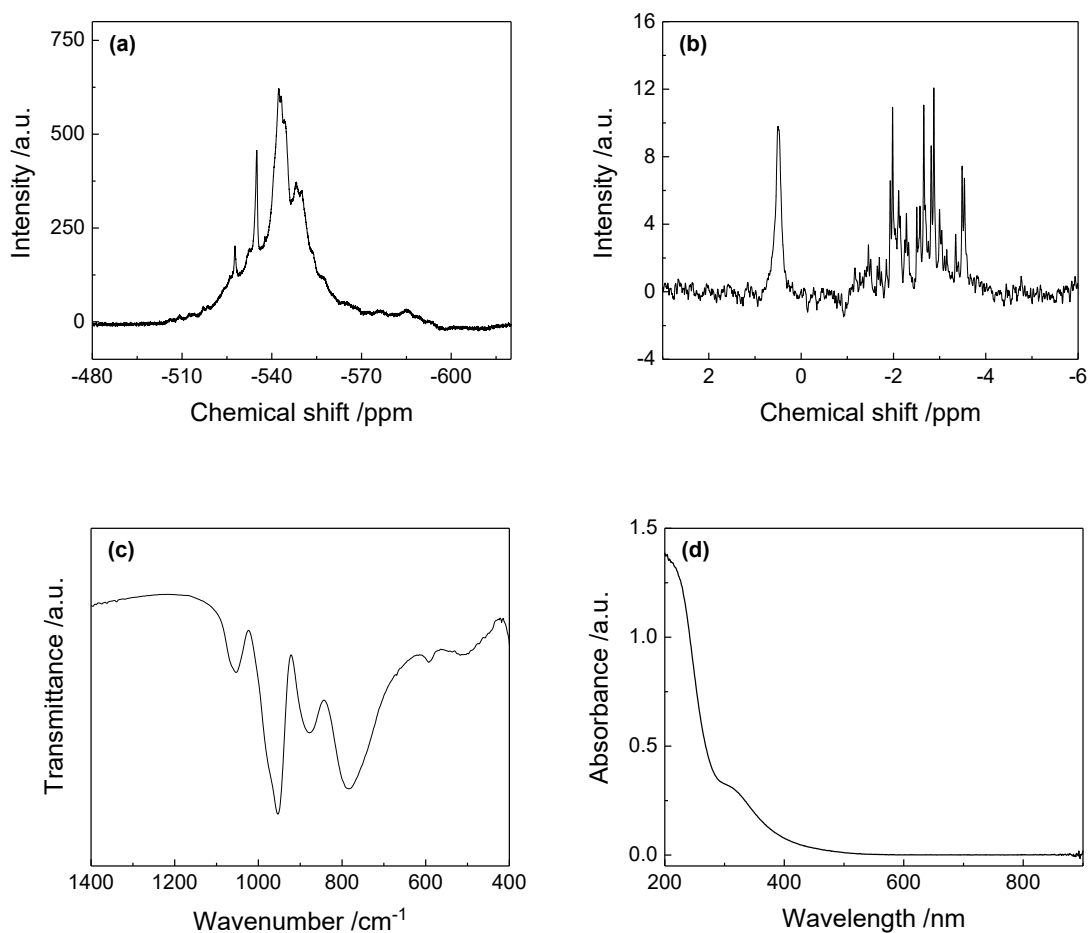

**Fig. S1** (a)  $^{51}\text{V}$  NMR spectrum shows all characteristic peaks for the pentavalent vanadium species derived from HPA-5 in aqueous solution, including  $-533$  ppm (V-1 species),  $-528$ ,  $-535$ ,  $-537$  ppm (V-2 species),  $-540$  to  $-560$  ppm (V-3 and  $\text{VO}_2^+$  species),  $-560$  to  $-620$  ppm (V-4, V-5 and V-6 species).<sup>17</sup> (b)  $^{31}\text{P}$  NMR spectrum shows characteristic peaks for the multiple positional isomers at  $-4$  to  $-1$  ppm and the free  $\text{PO}_4^{3-}$  anion at  $+0.5$  ppm.<sup>6</sup> (c) FT-IR spectrum shows four characteristic peaks for the Keggin structure at  $1053$   $\text{cm}^{-1}$ ,  $955$   $\text{cm}^{-1}$ ,  $877$   $\text{cm}^{-1}$  and  $783$   $\text{cm}^{-1}$ , assigned to  $\text{P-O}_a$  (inner oxygen),  $\text{M-O}_d$  (terminal oxygen),  $\text{M-O}_b\text{-M}$  (corner-sharing oxygen) and  $\text{M-O}_c\text{-M}$  (edge-sharing oxygen), respectively ( $\text{M} = \text{Mo}, \text{V}$ ). (d) UV-Vis spectrum displays ligand-to-metal charge transfer bands associated to the oxygen- $\text{Mo}^{6+}$  transition in octahedral coordination around  $217$  nm and  $300$  nm.

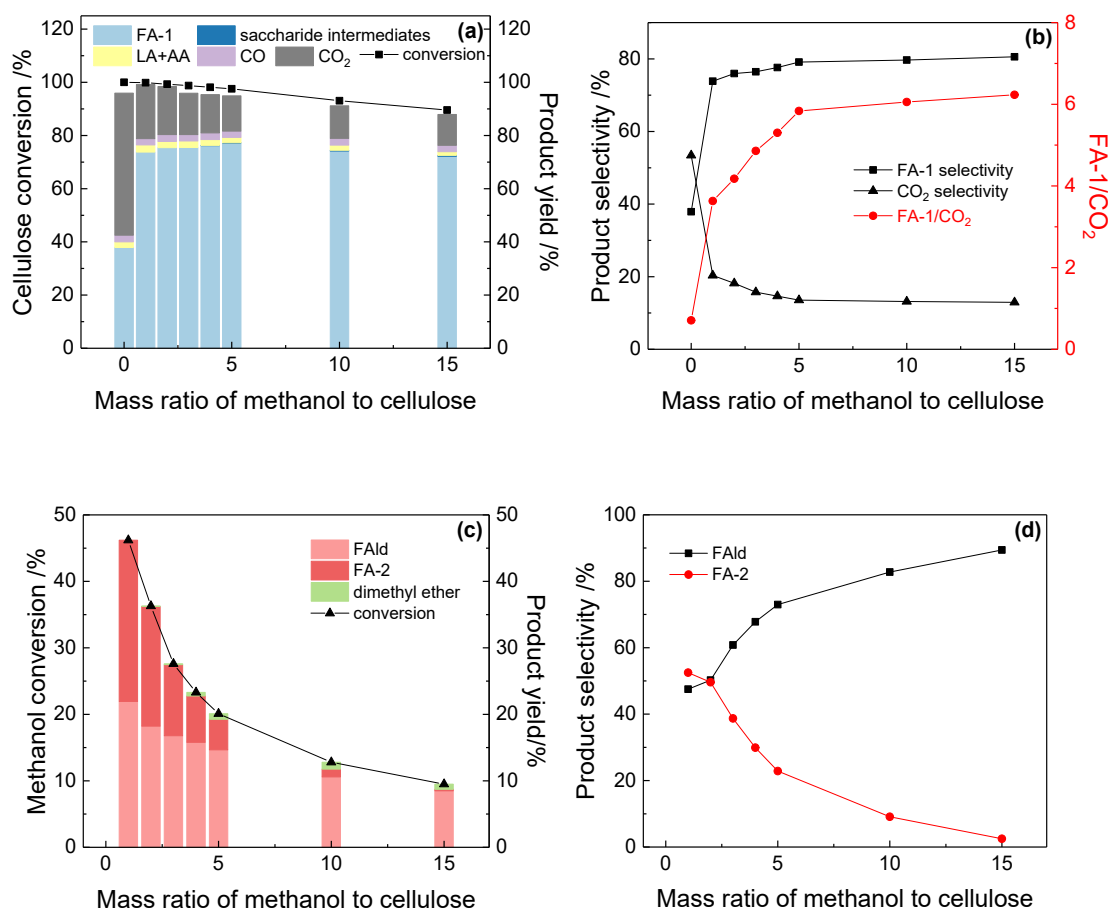

**Fig. S2** Effect of mass ratio of methanol to cellulose on (a) the conversion of cellulose and the yields of products from cellulose, (b) the selectivities of products from cellulose and the molar ratio of FA-1 to CO<sub>2</sub>, (c) the conversion of methanol and the yields of products from methanol, (d) the selectivities of products from methanol. Reaction conditions: cellulose, 0.32 g; HPA-5, 5.4 mM; H<sub>2</sub>SO<sub>4</sub>, 0.15 M; H<sub>2</sub>O, 20 mL; O<sub>2</sub> pressure, 3 MPa; temperature, 180 °C; reaction time, 20 min.



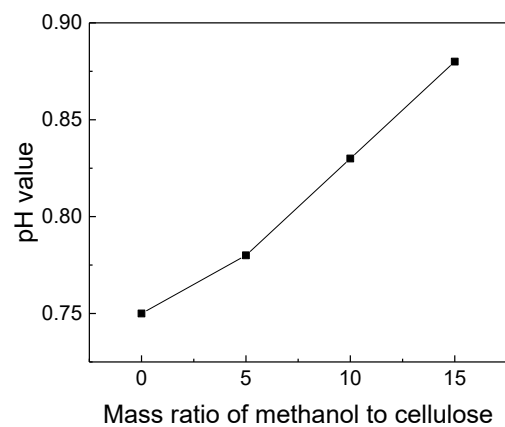

**Fig. S3** Effect of mass ratio of methanol to cellulose on pH value of the catalytic system.

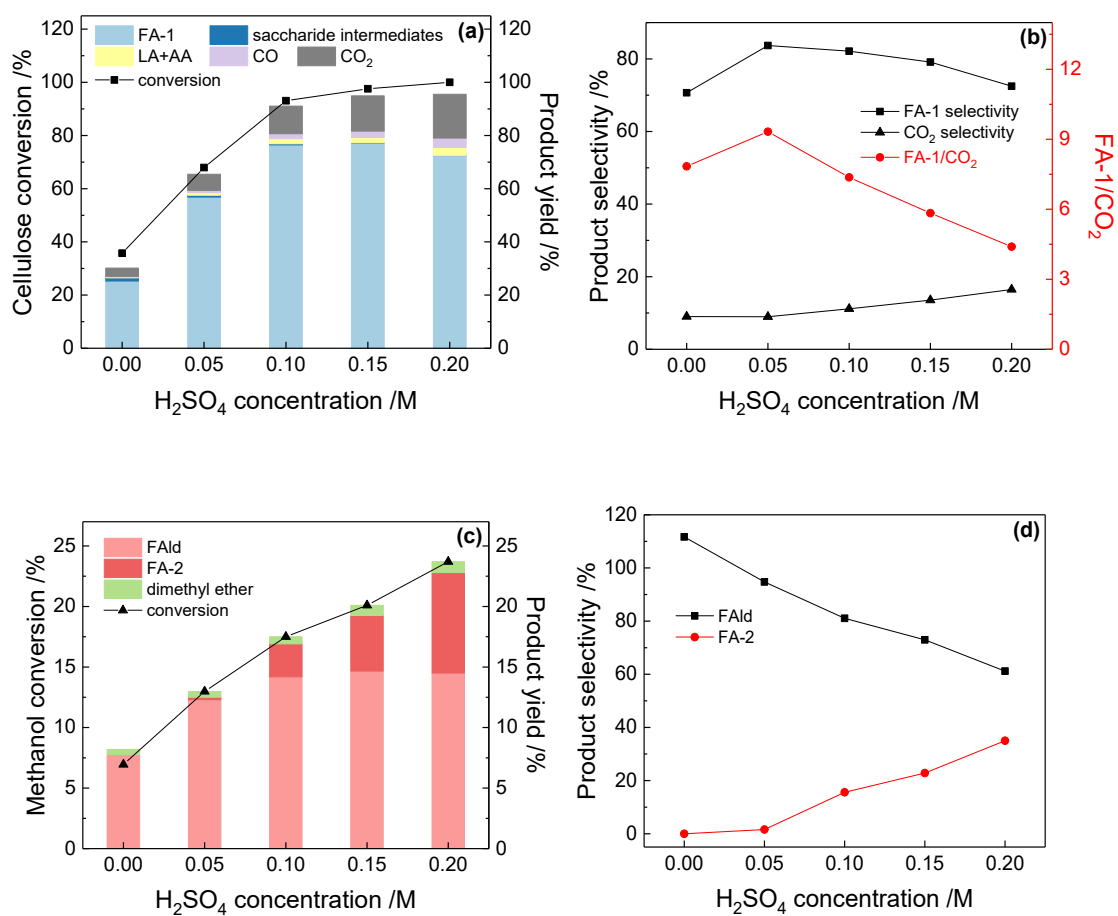

**Fig. S4** Effect of  $H_2SO_4$  concentration on (a) the conversion of cellulose and the yields of products from cellulose, (b) the selectivities of products from cellulose and the molar ratio of FA-1 to  $CO_2$ , (c) the conversion of methanol and the yields of products from methanol, (d) the selectivities of products from methanol. Reaction conditions: cellulose, 0.32 g; methanol, 1.6 g; HPA-5, 5.4 mM;  $H_2O$ , 20 mL;  $O_2$  pressure, 3 MPa; temperature, 180 °C; reaction time, 20 min.

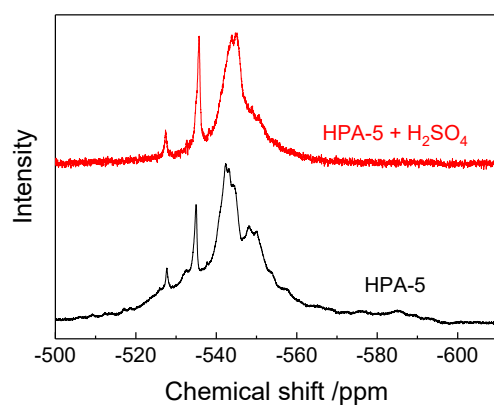

**Fig. S5** <sup>51</sup>V NMR spectra of HPA-5 in aqueous solutions with and without H<sub>2</sub>SO<sub>4</sub>. The characteristic peaks of various pentavalent vanadium species were shown, including -533 ppm (V-1 species), -528, -535, -537 ppm (V-2 species), -540 to -560 ppm (V-3 and VO<sub>2</sub><sup>+</sup> species), -560 to -620 ppm (V-4, V-5 and V-6 species).<sup>17</sup> V-*n* (*n* = 1–6) denote heteropoly anions of various vanadium-substitution numbers.

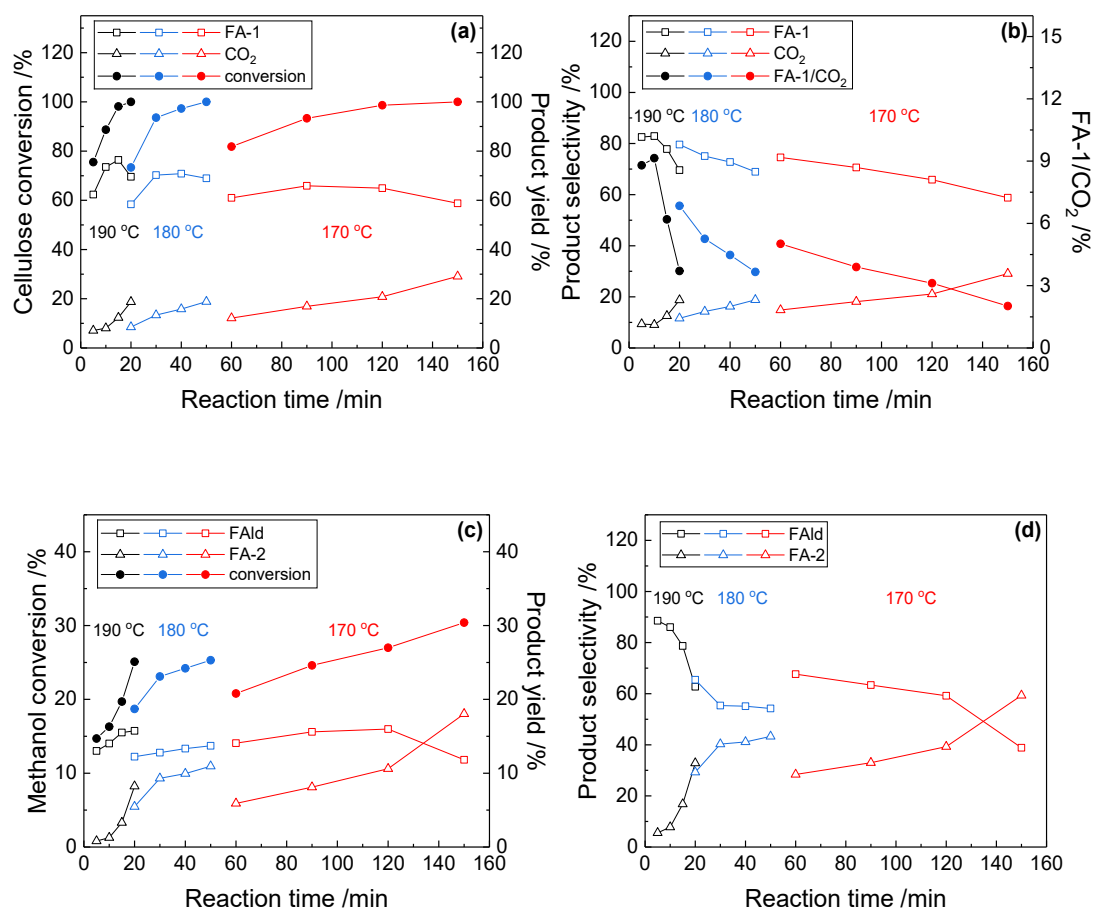

**Fig. S6** Effects of reaction temperature and time on (a) the conversion of cellulose and the yields of products from cellulose, (b) the selectivities of products from cellulose and the molar ratio of FA-1 to CO<sub>2</sub>, (c) the conversion of methanol and the yields of products from methanol, (d) the selectivities of products from methanol. Reaction conditions: cellulose, 0.32 g; methanol, 1.6 g; HPA-5, 5.4 mM; H<sub>2</sub>SO<sub>4</sub>, 0.05 M; H<sub>2</sub>O, 20 mL; O<sub>2</sub> pressure, 3 MPa.

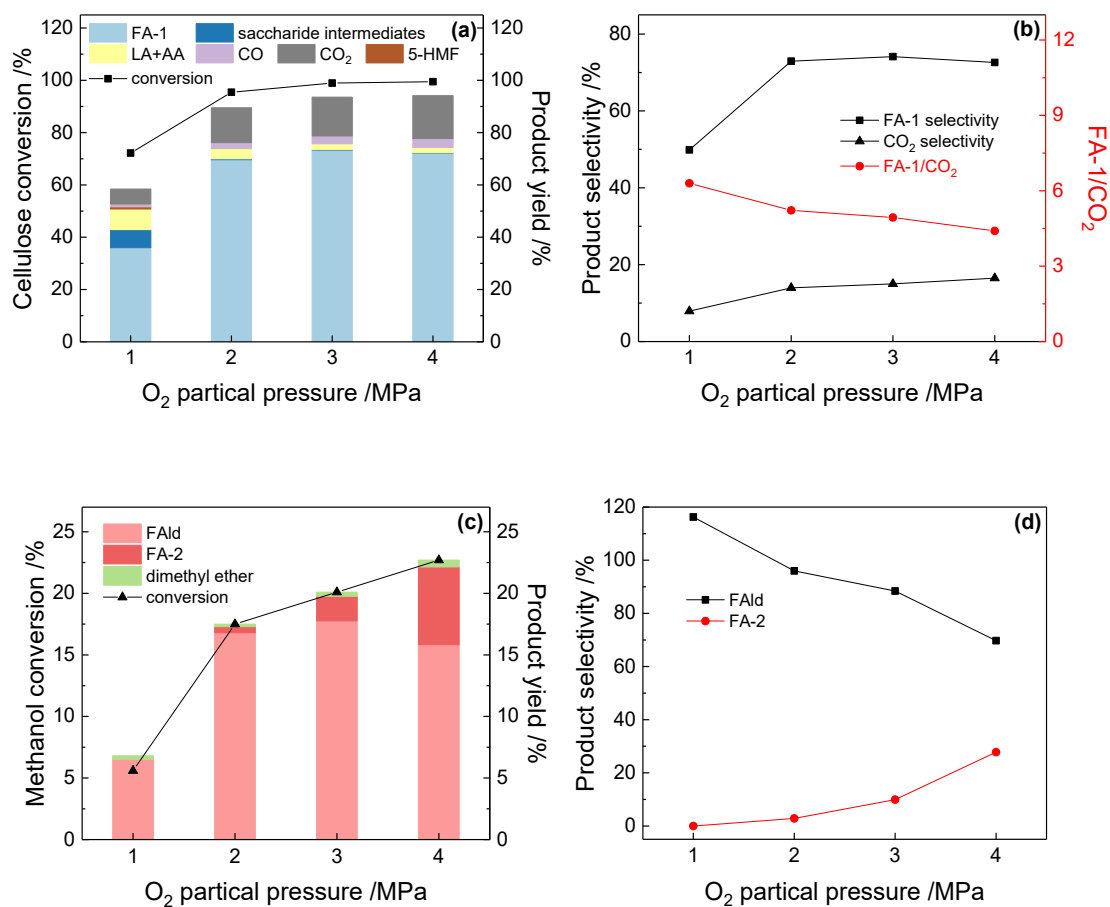

**Fig. S7** Effect of O<sub>2</sub> partial pressure on (a) the conversion of cellulose and the yields of products from cellulose, (b) the selectivities of products from cellulose and the molar ratio of FA-1 to CO<sub>2</sub>, (c) the conversion of methanol and the yields of products from methanol, (d) the selectivities of products from methanol. Reaction conditions: cellulose, 0.32 g; methanol, 1.6 g; HPA-5, 5.4 mM; H<sub>2</sub>SO<sub>4</sub>, 0.05 M; H<sub>2</sub>O, 20 mL; total gas pressure, 4 MPa; temperature, 190 °C; reaction time, 15 min.

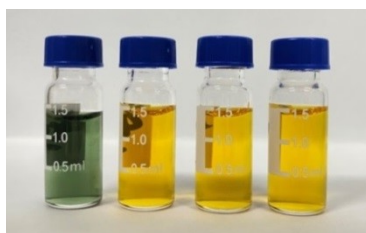

(a) (b) (c) (d)

**Fig. S8** Colors of solutions after reactions at the  $O_2$  partial pressures of (a) 1 MPa, (b) 2 MPa, (c) 3 MPa, (d) 4 MPa. The tetravalent and pentavalent vanadiums show blue and yellow, respectively, and the partially reduced HPA-5 (containing tetravalent and pentavalent vanadiums) shows green.<sup>6,18</sup> Reaction conditions: cellulose, 0.32 g; methanol, 1.6 g; HPA-5, 5.4 mM;  $H_2SO_4$ , 0.05 M;  $H_2O$ , 20 mL; total gas pressure, 4 MPa; temperature, 190 °C; reaction time, 15 min.

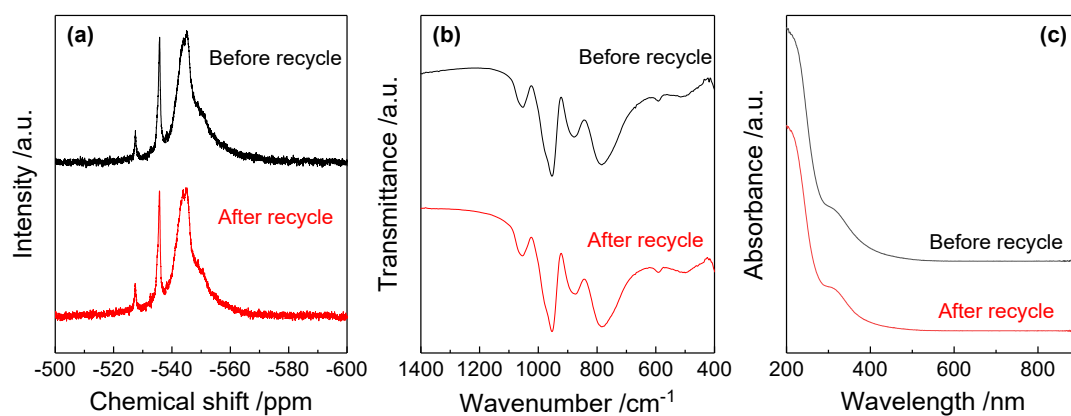

**Fig. S9** (a)  $^{51}V$  NMR, (b) FT-IR and (c) UV-Vis spectra of HPA-5 +  $H_2SO_4$  catalyst before and after the recycling experiments.

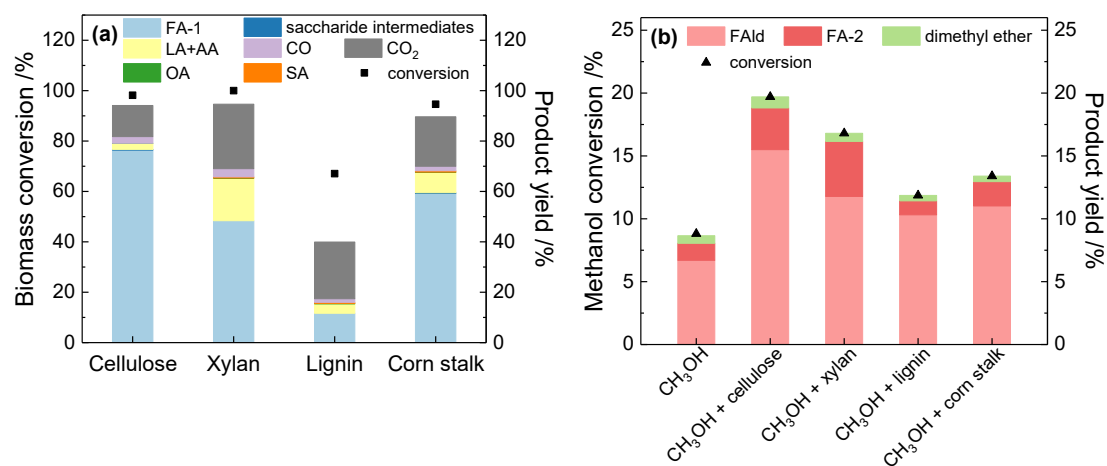

**Fig. S10** Coupling oxidations of different biomass and methanol and the separate oxidation of methanol. (a) The conversion of biomass and the yields of products from biomass. (b) The conversion of methanol and the yields of products from methanol. Reaction conditions: biomass, 0.32 g; methanol, 1.6 g; HPA-5, 5.4 mM; H<sub>2</sub>SO<sub>4</sub>, 0.05 M; H<sub>2</sub>O, 20 mL; O<sub>2</sub> pressure, 3 MPa; temperature, 190 °C; reaction time, 15 min. OA: oxalic acid; SA: succinic acid.

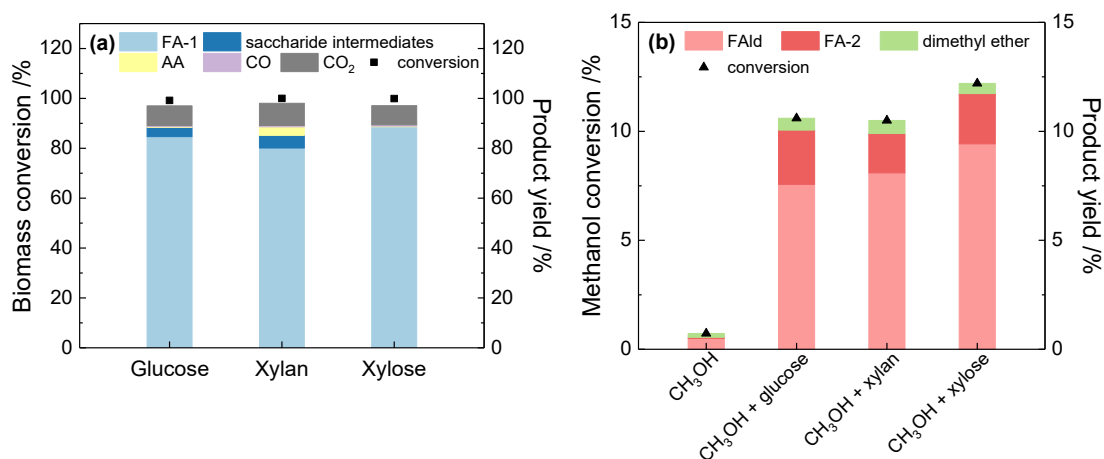

**Fig. S11** Coupling oxidations of various water-soluble biomass and methanol and the separate oxidation of methanol. (a) The conversion of biomass and the yields of products from biomass. (b) The conversion of methanol and the yields of products from methanol. Reaction conditions: biomass, 0.32 g; methanol, 1.6 g; HPA-5, 5.4 mM; H<sub>2</sub>O, 20 mL; O<sub>2</sub> pressure, 3 MPa; temperature, 90 °C; reaction time, 28 h.

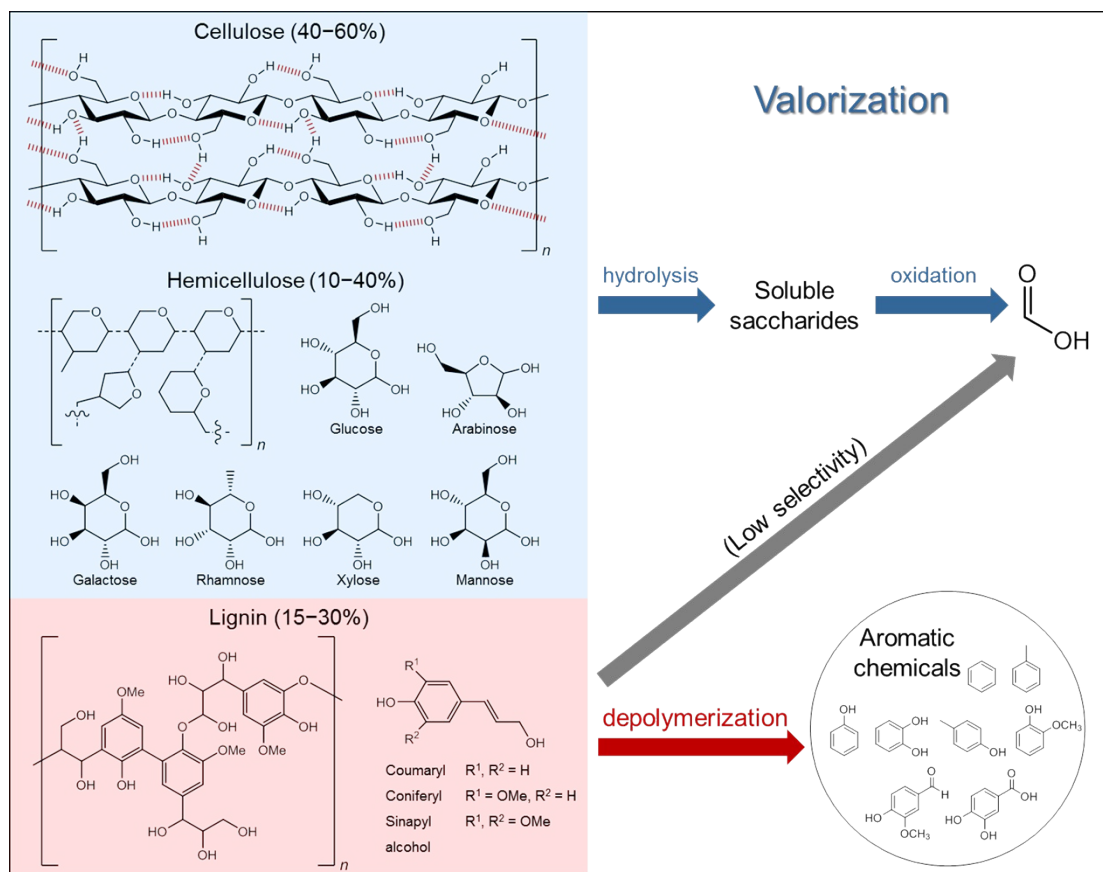

**Fig. S12** The structural components of lignocellulose and their proper valorizations.

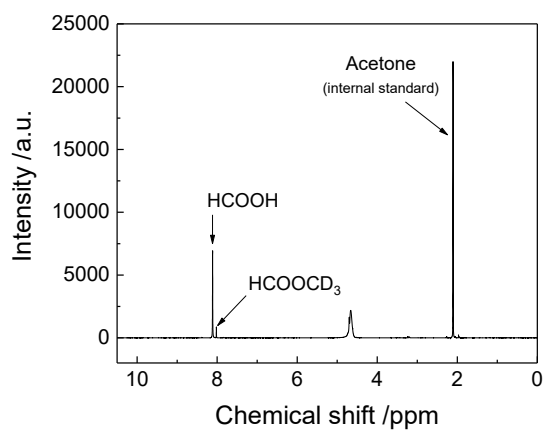

**Fig. S13** <sup>1</sup>H NMR spectrum of liquid products in the coupling oxidations of cellulose and CD<sub>3</sub>OD. Reaction conditions: cellulose, 0.32 g; CD<sub>3</sub>OD, 0.05 mmol (1.8 g); HPA-5, 5.4 mM; H<sub>2</sub>SO<sub>4</sub>, 0.05 M; H<sub>2</sub>O, 20 mL; O<sub>2</sub> pressure, 3 MPa; temperature, 190 °C; reaction time, 15 min.



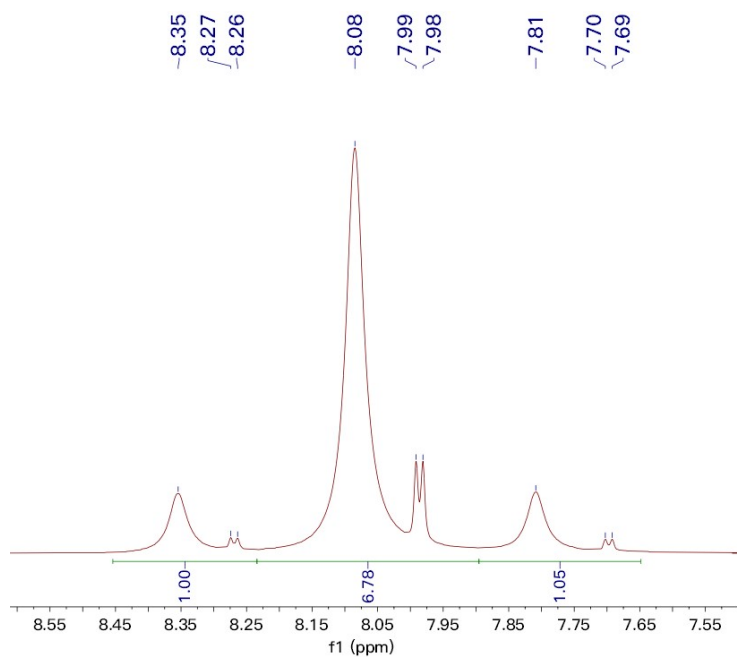

**Fig. S14** <sup>1</sup>H NMR spectrum of liquid products in the coupling oxidations of cellulose and <sup>13</sup>CH<sub>3</sub>OH. Reaction conditions: mass ratio of methanol to cellulose, 5:1; <sup>13</sup>CH<sub>3</sub>OH, 0.2 g; HPA-5, 5.4 mM; H<sub>2</sub>SO<sub>4</sub>, 0.05 M; H<sub>2</sub>O, 2.4 mL; O<sub>2</sub> pressure, 3 MPa; temperature, 190 °C; reaction time, 15 min.

## Supplementary References

1. Z. C. Tang, W. P. Deng, Y. L. Wang, E. Z. Zhu, X. Y. Wan, Q. H. Zhang and Y. Wang, *ChemSusChem*, 2014, **7**, 1557–1567.
2. W. H. Wang, M. G. Niu, Y. C. Hou, W. Z. Wu, Z. Y. Liu, Q. Y. Liu, S. H. Ren and K. N. Marsh, *Green Chem.*, 2014, **16**, 2614–2618.
3. T. Lu, Y. Hou, W. Wu, M. Niu, W. Li and S. Ren, *Fuel Process. Technol.*, 2018, **173**, 197-204.
4. J. Z. Zhang, M. Sun, X. Liu and Y. Han, *Catal. Today*, 2014, **233**, 77-82.
5. J. Albert, R. Wölfel, A. Bösmann and P. Wasserscheid, *Energy Environ. Sci.*, 2012, **5**, 7956-7962.
6. J. Albert, D. Lüders, A. Bösmann, D. M. Guldi and P. Wasserscheid, *Green Chem.*, 2014, **16**, 226–237.
7. T. Lu, M. G. Niu, Y. C. Hou, W. Z. Wu, S. H. Ren and F. Yang, *Green Chem.*, 2016, **18**, 4725-4732.
8. N. V. Gromov, O. P. Taran, I. V. Delidovich, A. V. Pestunov, Y. A. Rodikova, D. A. Yatsenko, E. G. Zhizhina and V. N. Parmon, *Catal. Today*, 2016, **278**, 74-81.
9. J. Xu, H. Zhang, Y. Zhao, Z. Yang, B. Yu, H. Xu and Z. Liu, *Green Chem.*, 2014, **16**, 4931-4935.
10. Y. Guo, S. Li, Y. Sun, L. Wang, W. Zhang, P. Zhang, Y. Lan and Y. Li, *Green Chem.*, 2021, **23**, 7041–7052.
11. R. Wölfel, N. Taccardi, A. Bösmann and P. Wasserscheid, *Green Chem.*, 2011, **13**, 2759–2763.
12. B. B. Sarma and R. Neumann, *Nat. Commun.*, 2014, **5**, 4621.
13. S. Maerten, C. Kumpidet, D. Voß, A. Bukowski, P. Wasserscheid and J. Albert, *Green Chem.*, 2020, **22**, 4311–4320.
14. J. Reichert, B. Brunner, A. Jess, P. Wasserscheid and J. Albert, *Energy Environ. Sci.*, 2015, **8**, 2985–2990.
15. Z. He, Y. Hou, H. Li, Y. Wang, S. Ren and W. Wu, *Renew. Energy*, 2023, **211**, 403–411.

16. D. Voß, H. Pickel and J. Albert, *ACS Sustain. Chem. Eng.*, 2019, **7**, 9754-9762.
17. J. Albert, M. Mendt, M. Mozer and D. Voß, *Appl. Catal. A: Gen.*, 2019, **570**, 262–270.
18. S. Ponce, M. Trabold, A. Drochner, J. Albert and B. J. M. Etzold, *Chem. Eng. J.*, 2019, **369**, 443–450.
